# Supplementary material for: Ordered mesoporous carbons-supported gold nanoparticles as highly efficient electrocatalysts for oxygen reduction reaction
Source: Royal Society of Chemistry journal article supplement (doi:10.1039/c5ra20955b), 2015-01-01
Supplement: c5ra20955b1.pdf [file c5ra20955b1.pdf]

Electronic Supplementary Information

## Ordered mesoporous carbons-supported gold nanoparticles as highly efficient electrocatalysts for oxygen reduction reaction

Likai Wang,<sup>a</sup> Zhenghua Tang,<sup>\*,a,b</sup> Xiaojun Liu,<sup>a</sup> Wenhan Niu,<sup>a</sup> Kai Zhou,<sup>a</sup> Hongyu Yang,<sup>a</sup> Weijia Zhou,<sup>a</sup> Ligui Li,<sup>a</sup> and Shaowei Chen<sup>\*,a,c</sup>

<sup>a</sup> *New Energy Research Institute, School of Environment and Energy, South China University of Technology, Guangzhou Higher Education Mega Center, Guangzhou, 510006, P. R. China. Email: zhht@scut.edu.cn.*

<sup>b</sup> *Guangdong Provincial Key Laboratory of Atmospheric Environment and Pollution Control, Guangzhou, Guangdong, 510006, P. R. China*

<sup>c</sup> *Department of Chemistry and Biochemistry, University of California, 1156 High Street, Santa Cruz, California 95064, United States. Email: shaowei@ucsc.edu.*

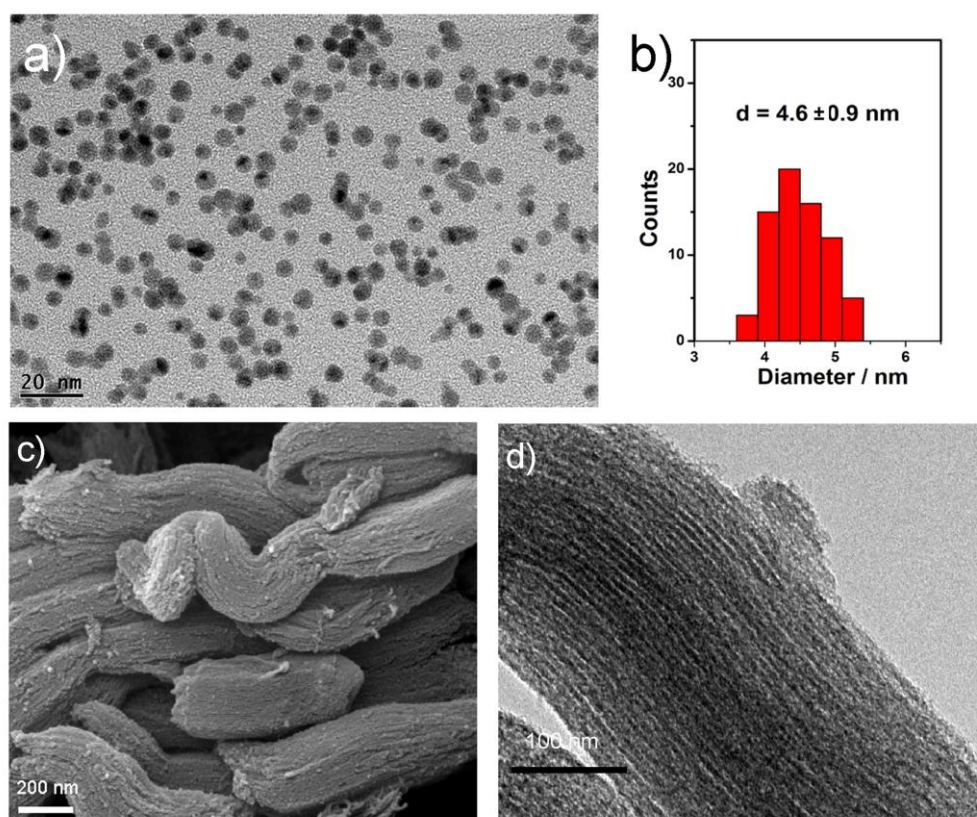

**Figure S1.** a) TEM image and b) the size distribution histogram of Au-4nm NPs. c) SEM and d) TEM images of Z-SBA15.

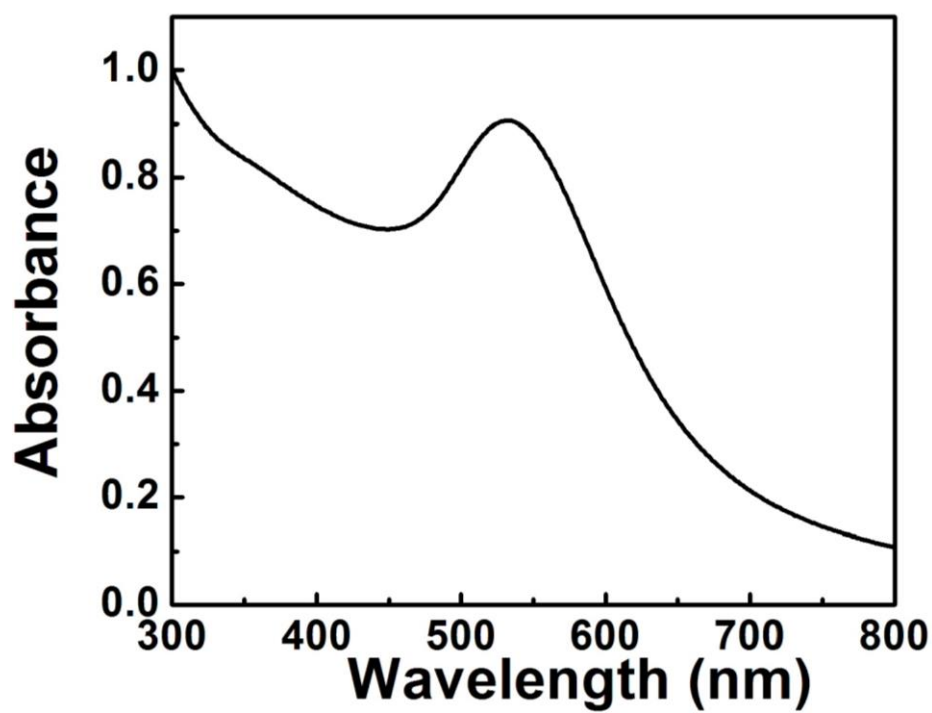

**Figure S2.** UV-visible absorption spectra of Au NPs.

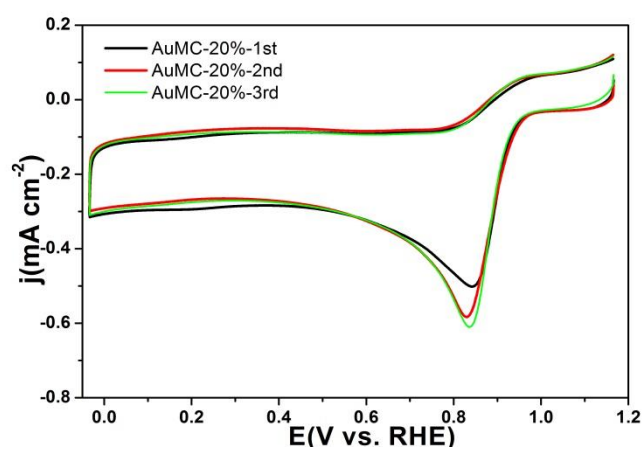

**Figure S3.** Cyclic voltammograms of three batches of AuMC-20% samples on a glassy carbon electrode in O<sub>2</sub>-saturated 0.1 M KOH. Other conditions were the same as those in Fig. 5.

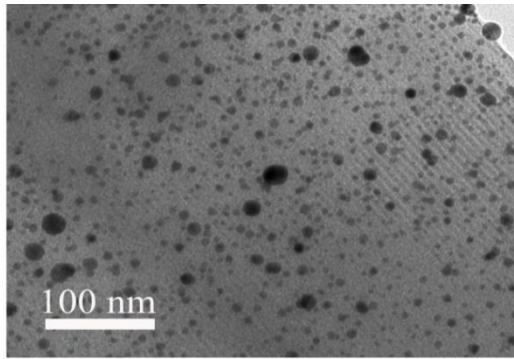

**Figure S4.** Representative TEM image of AuMC-20% after ORR tests in O<sub>2</sub>-saturated 0.1 M KOH.
